# Supplementary material
Source: MDPI journal article supplement (https://www.mdpi.com/2073-4433/13/6/976)
Supplement: s1 [file s1]

# Supplementary Materials: Effects of Chemical Reactions on the Oxidative Potential of Humic Acid, a Model Compound of Atmospheric Humic-like Substances

Yohei Koike <sup>1</sup> and Takayuki Kameda <sup>1,\*</sup>

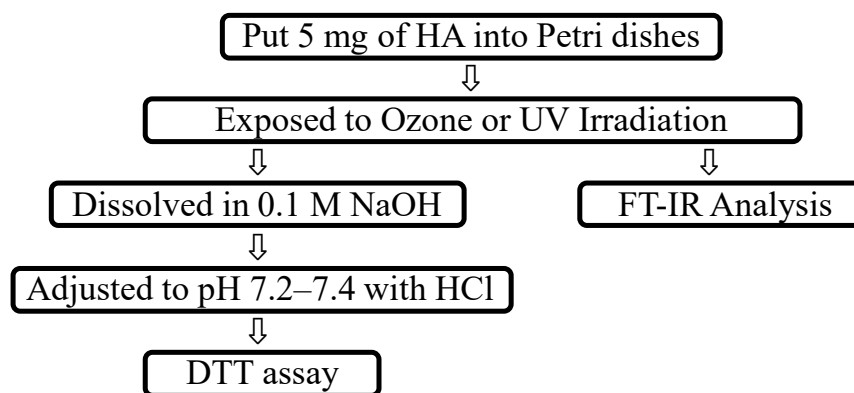

Figure S1. Flow chart of the experimental procedure.

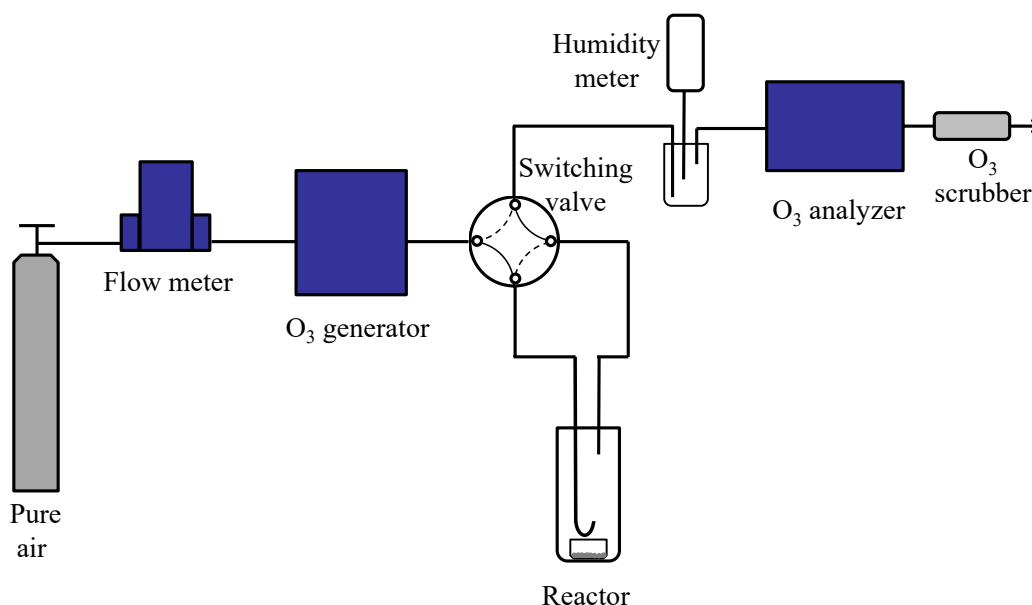

Figure S2. Schematic diagram of the equipment for the ozone reaction.

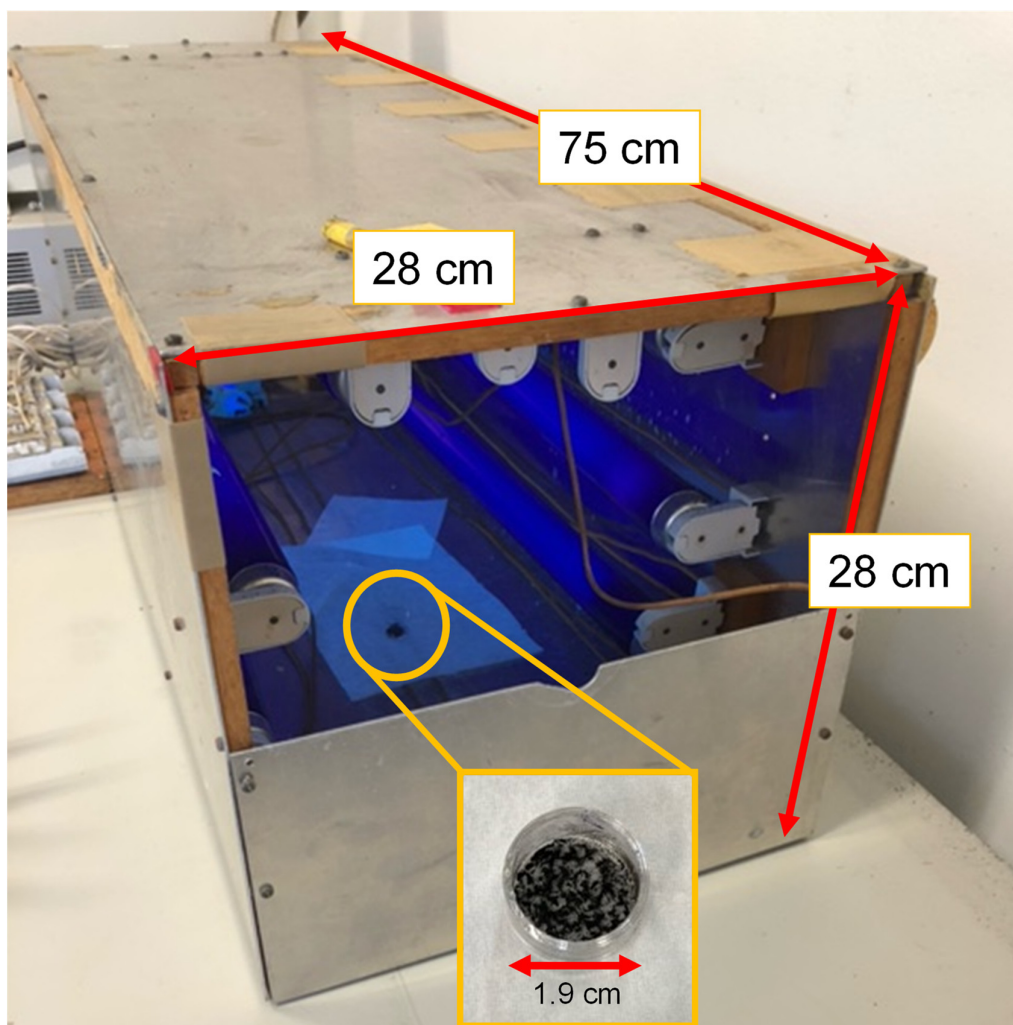

**Figure S3.** Photos of the apparatus for the UV-irradiation experiments.
